# Supplementary material
Source: Springer Nature journal article supplement (https://www.springermedizin.de/resource/supplementary/12943_2010_592_MOESM3_ESM.pdf/9555056)

**A**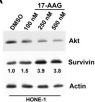**B**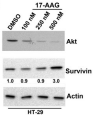**Geldanamycin**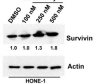**Geldanamycin**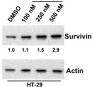

Supplement: MOESM3 [file 9555056]
